# Supplementary material
Source: PubMed Central journal article supplement (PMC3979171)
Supplement: supp_en.2012-1138_en-12-1138_-2T-1F_Guennoun_PR_Stroke.pdf [file supp_en.2012-1138_en-12-1138_-2T-1F_Guennoun_PR_Stroke.pdf]

**Supplemental Table 1.**  
**Gas chromatography (GC) /mass spectrometry (MS) parameters used for steroid identification and quantification in single ion monitoring mode**

| <b>Steroids (MW)</b>                               | <b>Derivatized steroids (MW)</b>                                                           | <b>GC: retention time (min.)</b> | <b>MS: diagnostic ions (m/z)</b> |
|----------------------------------------------------|--------------------------------------------------------------------------------------------|----------------------------------|----------------------------------|
| Progesterone (314)                                 | Progesterone-3-HFB (510)                                                                   | 17.47                            | 495 and <b>510</b>               |
| 5 $\alpha$ -DHP (316)                              | 5 $\alpha$ -DHP-3,20-TMS <sub>2</sub> (460)                                                | 19.87                            | <b>445</b> and 460               |
| Allopregnanolone (318)                             | Allopregnanolone-3-HFB (514)                                                               | 16.47                            | 496 and <b>514</b>               |
| Corticosterone (346)                               | Corticosterone-3,21-HFB <sub>2</sub> - H <sub>2</sub> O (720)                              | 19.68                            | <b>705</b> and 720               |
| <b>Internal standards</b>                          |                                                                                            |                                  |                                  |
| 19 norprogesterone (300)                           | 19 nor-progesterone-3-HFB (496)                                                            | 17.28                            | 481 and <b>496</b>               |
| <sup>2</sup> H <sub>6</sub> -5 $\alpha$ -DHP (322) | <sup>2</sup> H <sub>6</sub> -5 $\alpha$ -DHP-3,20-TMS <sub>2</sub> (466)                   | 19.80                            | <b>448-451</b> and 466           |
| <sup>2</sup> H <sub>8</sub> -corticosterone (354)  | <sup>2</sup> H <sub>8</sub> -Corticosterone-3,21-HFB <sub>2</sub> - H <sub>2</sub> O (728) | 19.58                            | <b>709-713</b> and 728           |

Two diagnostic ions were used for identification and the one in bold was used for quantification.

(MW: molecular weight, 5 $\alpha$ -DHP: 5 $\alpha$ -dihydroprogesterone, HFB: heptafluorobutyrate derivative, TMS: trimethylsilyl derivative).

**Supplemental Table 2. Quantitative polymerase chain reaction (qPCR).**

| <b>mRNA</b>  | <b>Primer sequences 5' to 3'</b>                                    | <b>Ex</b>           | <b>r</b>                |
|--------------|---------------------------------------------------------------------|---------------------|-------------------------|
| <b>PR</b>    | PR F: CCGGAGAAGGACAGCAGACT<br>PR R: GGGCTGGCGTGACTCTGTT             | <b>93.68 ± 1.73</b> | <b>0.997±<br/>0.003</b> |
| <b>Cyc b</b> | Cyc F: GTGGCAAGATCGAAGTGGAGAAAC<br>Cyc R: TAAAAATCAGGCCTGTGGAAT GTG | <b>92.08 ± 2.11</b> | <b>0.997 ±<br/>0.01</b> |

Correlation coefficients (r) confirm the linear relationship between the threshold cycle and the logarithm of the cDNA concentration. The PCR efficiency (Ex) was calculated using the equation  $Ex = (10^{-1/\text{slope}}) - 1 \times 100$ . Similar amplification efficiency rates between target and reference genes were obtained (Ex close to 1). The r and Ex values showed that PCR conditions have been properly optimized (PR = progesterone receptor; Cyc b = cyclophilin b; F = Forward; R = reverse).

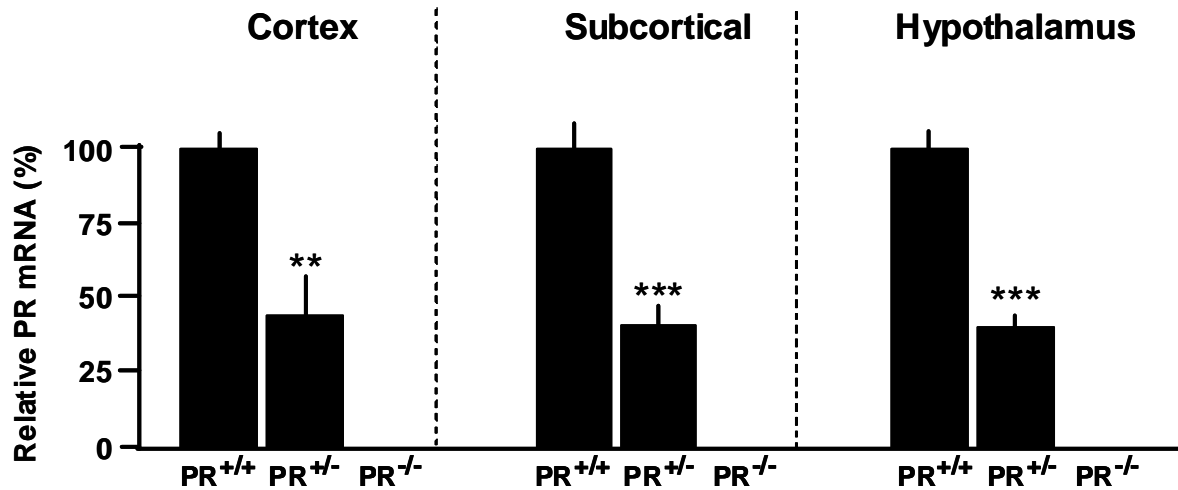

**Supplemental Figure 1. Analysis of PR mRNA expression in brains of  $PR^{+/+}$ ,  $PR^{+/-}$  and  $PR^{-/-}$  mice by qPCR.** When compared to  $PR^{+/+}$  male mice (= 100%), PR mRNA expression is reduced by about 60% in cerebral cortex, subcortical regions and hypothalamus of  $PR^{+/-}$  mice, and is not detected in  $PR^{-/-}$  mice (means  $\pm$  s.e.m.,  $n=4$  per group). Comparisons between  $PR^{+/+}$  and  $PR^{+/-}$  were performed by unpaired Student's t-test for each brain region (\*\* $P < 0.01$ , \*\*\* $P < 0.001$ ).
